# Supplementary material for: Prognostic Value of Chromatin Structure Typing in Early-Stage Non-Small Cell Lung Cancer
Source: MDPI journal article supplement (doi:10.3390/cancers15123171), 2023-06-13
Supplement: s1 [file s1]

Table S1. Associations between PN and relevant clinicopathologic variables in early-stage NSCLC patients

| Variables               | PN low risk (%) | PN middle risk (%) | PN high risk (%) | Coefficient | P-value |
|-------------------------|-----------------|--------------------|------------------|-------------|---------|
| Age, years              | 61.33±8.24      | 62.06±8.40         | 61.82±10.45      | -0.043      | 0.908   |
| Gender                  |                 |                    |                  | 0.116       | 0.317   |
| Male                    | 34 (66.7)       | 40 (62.5)          | 20 (51.3)        |             |         |
| Female                  | 17 (33.3)       | 24 (37.5)          | 19 (48.7)        |             |         |
| Histologic type         |                 |                    |                  | -0.265      | 0.004   |
| Adenocarcinoma          | 22 (43.1)       | 40 (62.5)          | 30 (76.9)        |             |         |
| Squamous carcinoma      | 29 (56.9)       | 24 (37.5)          | 9 (23.1)         |             |         |
| Stage                   |                 |                    |                  | 0.057       | 0.523   |
| Stage I                 | 37 (72.5)       | 40 (62.5)          | 26 (66.7)        |             |         |
| Stage II                | 14 (27.5)       | 24 (37.5)          | 13 (33.3)        |             |         |
| Lymph node status       |                 |                    |                  | 0.160       | 0.131   |
| Negative                | 46 (90.2)       | 51 (79.9)          | 29 (74.4)        |             |         |
| Positive                | 5 (9.8)         | 13 (20.3)          | 10 (25.6)        |             |         |
| Smoke                   |                 |                    |                  | -0.187      | 0.032   |
| No                      | 22 (43.1)       | 30 (46.8)          | 27 (69.2)        |             |         |
| YES                     | 29 (56.9)       | 34 (53.1)          | 12 (30.8)        |             |         |
| Recurrent or metastatic |                 |                    |                  | 0.216       | 0.007   |
| No                      | 43 (84.3)       | 41 (64.0)          | 23 (59)          |             |         |
| YES                     | 8 (15.7)        | 23 (35.9)          | 16 (41.0)        |             |         |
| Adjuvant therapy        |                 |                    |                  | 0.114       | 0.066   |
| No                      | 4 (78.4)        | 37 (57.8)          | 26 (66.7)        |             |         |
| YES                     | 11 (21.6)       | 27 (42.2)          | 13 (33.3)        |             |         |
| Total                   | 51 (100)        | 64 (100)           | 39 (100)         |             |         |

Table S2. Univariate and multivariate analysis of combined factors as predictors of DFS in early-stage Adenocarcinoma patients

| Variables                                               | n  | 5-year-DFS% (95%CI) | HR (95%CI)             | P-value | AHR (95%CI) <sup>a</sup> | P-value | P for trend |
|---------------------------------------------------------|----|---------------------|------------------------|---------|--------------------------|---------|-------------|
| PN                                                      |    |                     |                        |         |                          |         |             |
| Diploid and CHO (PN low risk)                           | 22 | 95.45 (71.87-99.35) | Ref.                   |         | Ref.                     |         |             |
| Diploid and CHE or non-diploid and CHO (PN middle risk) | 40 | 68.30 (49.79-81.19) | 7.886 (1.022-60.873)   | 0.048   | 5.800 (0.721-46.640)     | 0.098   | 0.001       |
| Non-diploid and CHE (PN high risk)                      | 30 | 46.25 (25.93-64.36) | 16.257 (2.141-123.444) | 0.007   | 15.632 (2.005-121.903)   | 0.009   |             |
| PS                                                      |    |                     |                        |         |                          |         |             |
| Diploid and LS (PS low risk)                            | 21 | 95.24 (70.72-99.32) | Ref.                   |         | Ref.                     |         |             |
| Diploid and HS or non-diploid and LS (PS middle risk)   | 56 | 58.58 (42.87-71.34) | 10.437 (1.401-77.764)  | 0.022   | 9.336 (1.211-71.982)     | 0.032   | 0.021       |
| Non-diploid and HS (PS high risk)                       | 15 | 64.00 (33.49-83.35) | 9.642 (1.152-80.644)   | 0.037   | 10.336 (1.224-87.309)    | 0.032   |             |
| NS                                                      |    |                     |                        |         |                          |         |             |
| CHO and LS (NS low risk)                                | 49 | 77.84 (62.56-87.48) | Ref.                   |         | Ref.                     |         |             |
| CHO and HS or CHE and LS (NS middle risk)               | 38 | 60.48 (41.37-75.09) | 1.698 (0.761-3.793)    | 0.196   | 1.891 (0.806-4.434)      | 0.143   | 0.005       |
| CHE and HS (NS high risk)                               | 5  | 40.00 (5.20-75.28)  | 4.419 (1.367-14.281)   | 0.013   | 8.963 (2.413-33.301)     | 0.001   |             |
| PNS                                                     |    |                     |                        |         |                          |         |             |
| 0 high-risk factor (PNS low risk)                       | 20 | 95.00 (69.47-99.28) | Ref.                   |         | Ref.                     |         |             |
| 1 or 2 high-risk factors (PNS middle risk)              | 67 | 62.04 (47.90-73.37) | 8.680 (1.170-64.381)   | 0.035   | 6.808 (0.887-52.237)     | 0.065   | 0.001       |
| 3 high-risk factors (PNS high risk)                     | 5  | 40.00 (5.20-75.28)  | 23.037 (2.533-209.528) | 0.005   | 29.865 (3.231-276.057)   | 0.003   |             |

PN: DNA ploidy and nucleotyping, PS: DNA ploidy and stroma-tumor fraction, NS: Nucleotyping and stroma-tumor fraction, PNS: DNA ploidy, nucleotyping and stroma-tumor fraction

CHO: Chromatin homogeneous, CHE: Chromatin heterogeneous, LS: Low stroma, HS: High stroma

<sup>a</sup>Cox proportional hazard model adjusted for patient age, stage, smoking and adjuvant treatment.

**Table S3. Associations between PN and relevant clinicopathologic variables in early-stage Adenocarcinoma patients**

| Variables                 | PN low risk (%) | PN middle risk (%) | PN high risk (%) | Coefficient | <i>P</i> -value |
|---------------------------|-----------------|--------------------|------------------|-------------|-----------------|
| Age, years                | 61.33±8.24      | 62.06±8.40         | 61.82±10.45      | -0.043      | 0.908           |
| Gender                    |                 |                    |                  | -0.086      | 0.417           |
| Male                      | 6 (27.2)        | 18 (45.0)          | 12(40.0)         |             |                 |
| Female                    | 16(72.8)        | 22 (55.0)          | 18(60.0)         |             |                 |
| Stage                     |                 |                    |                  | 0.214       | 0.040           |
| Stage I                   | 21(95.5)        | 29(72.5)           | 21(70.0)         |             |                 |
| Stage II                  | 1(4.5)          | 11(27.5)           | 9(30.0)          |             |                 |
| Lymph node status         |                 |                    |                  | 0.245       | 0.018           |
| Negative                  | 22(100)         | 34(85.0)           | 23(76.7)         |             |                 |
| Positive                  | 0               | 6(15.0)            | 7(23.3)          |             |                 |
| Smoke                     |                 |                    |                  | -0.069      | 0.512           |
| No                        | 18(81.8)        | 24(60.0)           | 26(86.7)         |             |                 |
| YES                       | 4(18.2)         | 16(40.0)           | 4(13.3)          |             |                 |
| Differentiation           |                 |                    |                  | 0.257       | 0.013           |
| Well-differentiated       | 10(45.5)        | 8(20.0)            | 6(20.0)          |             |                 |
| Moderately differentiated | 10(45.5)        | 16(40.0)           | 12(40.0)         |             |                 |
| Poorly differentiated     | 2(9.0)          | 16(40.0)           | 12(40.0)         |             |                 |
| EGFR mutation             |                 |                    |                  | -0.006      | 0.955           |
| No                        | 5(22.7)         | 11(27.5)           | 8(26.7)          |             |                 |
| YES                       | 14(63.7)        | 26(65.0)           | 21(70.0)         |             |                 |
| Non                       | 3(13.6)         | 3(7.5)             | 1(3.3)           |             |                 |
| KARS mutation             |                 |                    |                  | -0.031      | 0.793           |
| No                        | 16(72.8)        | 29(72.5)           | 21(70.0)         |             |                 |
| YES                       | 3(13.6)         | 2(5.0)             | 3(10.0)          |             |                 |
| Non                       | 3(13.6)         | 9(22.5)            | 6(20.0)          |             |                 |

|                         |          |          |          |       |       |
|-------------------------|----------|----------|----------|-------|-------|
| Recurrent or metastatic |          |          |          | 0.366 | <0.01 |
| No                      | 21(95.5) | 28(70.0) | 15(50.0) |       |       |
| YES                     | 1(4.5)   | 12(30.0) | 15(50.0) |       |       |
| Adjuvant therapy        |          |          |          | 0.144 | 0.170 |
| No                      | 20(90.9) | 23(57.5) | 21(70.0) |       |       |
| YES                     | 2(9.1)   | 17(42.5) | 9(30.0)  |       |       |
| Total                   | 22(100)  | 40(100)  | 30(100)  |       |       |

---
